# Supplementary material
Source: PubMed Central journal article supplement (PMC3754176)
Supplement: AEM.00949-13_zam999104692so1.pdf [file AEM.00949-13_zam999104692so1.pdf]

## SUPPLEMENTAL FIGURES AND TABLES

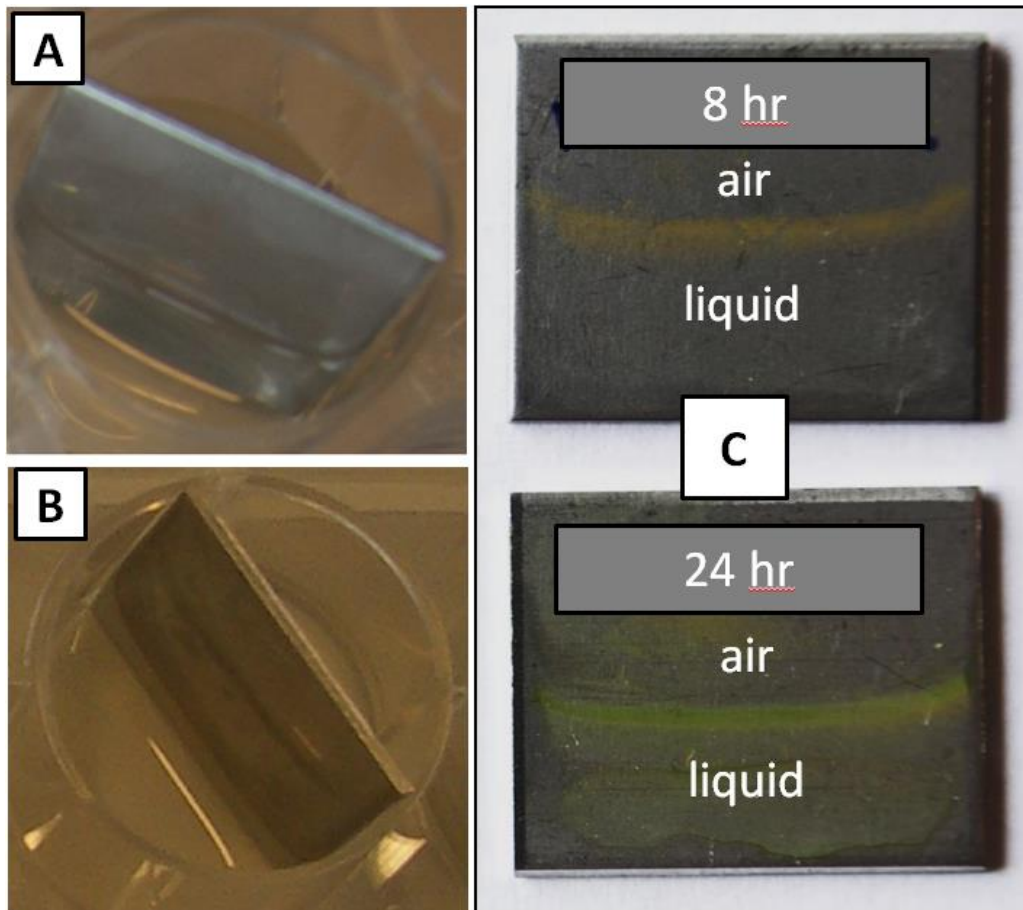

**Figure S1. Standing steel biofilm model system.** *Geobacillus thermoglucosidans* TNO-09.020 was cultured for 24h at 65°C. **(A)** Culture well with tryptone medium and stainless steel (SS) coupon. **(B)** Same well after 24h culturing: horizontal biofilm visible on washed SS coupon. **(C)** Auramine-stained coupons were harvested, washed and stained after 8 or 24 hours of culturing. The submerged and air-exposed parts of the coupons have been indicated (liquid air)

A)

| Inactiv. Temp. | Strain     | <i>Kmax</i> | <i>Nres</i> | <i>D</i> | <i>R square</i> |
|----------------|------------|-------------|-------------|----------|-----------------|
| 110 °C         | TNO-09.006 | 1.25        | 3.11        | 2        | 0.9643          |
|                | TNO-09.008 | 0.13        | 1           | 18       | 0.9872          |
|                | TNO-09.020 | 0.12        | 1           | 19       | 0.8921          |
| 120 °C         | TNO-09.006 | 3.01        | 2.92        | 0.8      | 0.9924          |
|                | TNO-09.008 | 2.19        | 4.03        | 1.1      | 0.9546          |
|                | TNO-09.020 | 3.09        | 5.01        | 0.8      | 0.9786          |
| 130 °C         | TNO-09.006 | 40.34       | 2.08        | 0.06     | 0.9788          |
|                | TNO-09.008 | 8.24        | 1.49        | 0.28     | 0.9892          |
|                | TNO-09.020 | 27.88       | 2.22        | 0.08     | 0.9775          |

B)

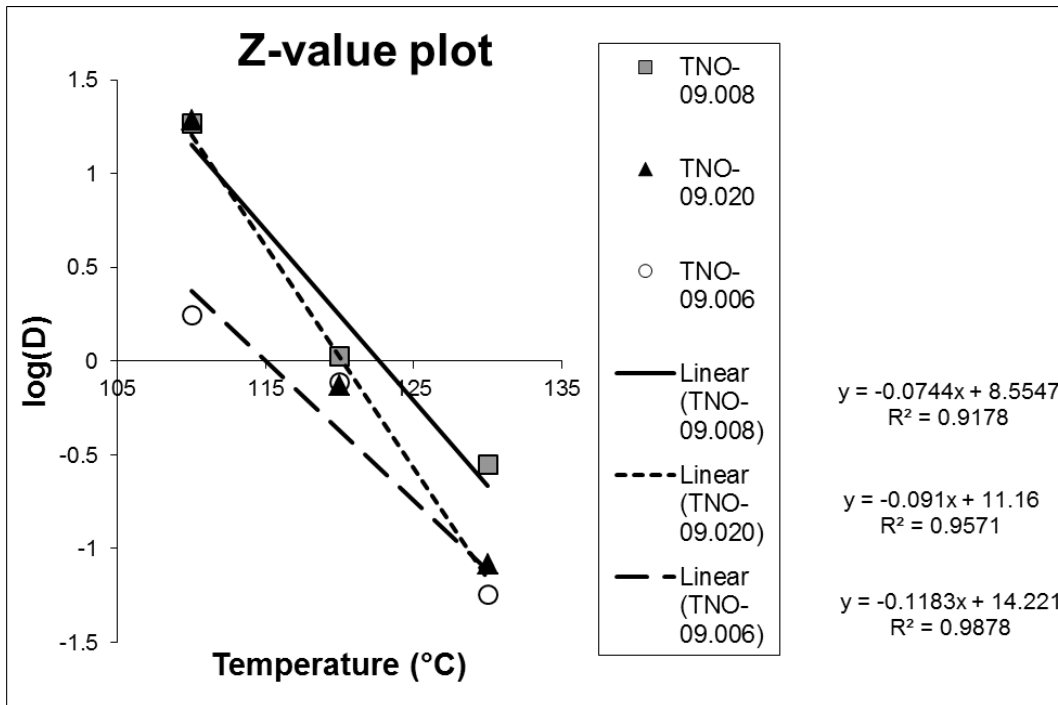

C)

| Strain            | <i>slope</i> | <i>Z</i> | <i>R square</i> |
|-------------------|--------------|----------|-----------------|
| <b>TNO-09.006</b> | -0.0744      | 13       | 0.9178          |
| <b>TNO-09.008</b> | -0.091       | 11       | 0.9571          |
| <b>TNO-09.020</b> | -0.1183      | 8        | 0.9878          |

**Figure S2. Heat inactivation kinetics of spores from thermophilic strains**

The heat inactivation kinetics of spores isolated in this study indicated by **(A)** D-values and other inactivation equation parameters, **(B)** linear logD/temperature equations, and **(C)** their slopes and Z-values. The D-values of the spore batches were derived from plots with log CFU versus incubation time by fitting the following log-linear model with tail to the data by using Excel add-in GInaFiT:

$$\log N_t = (\log N_0 - \log N_{res}) * \exp(-k_{max} * t) + \log N_{res}$$

In which  $\log N_t$  is the spore count at a certain time point,  $\log N_0$  is the spore count at  $t=0$ ,  $\log N_{res}$  is the number of spores in the tail and  $k_{max}$  is the inactivation constant. The D-value was derived by  $D = \ln(10)/k_{max}$ . In case of no tailing ( $\log N_{res} = 0$ ), the model was reduced to a log-linear inactivation model. The z-values were calculated by plotting the logD value against the temperature and performing a linear regression. The z-value was calculated by  $z = -1/\text{slope}$ .

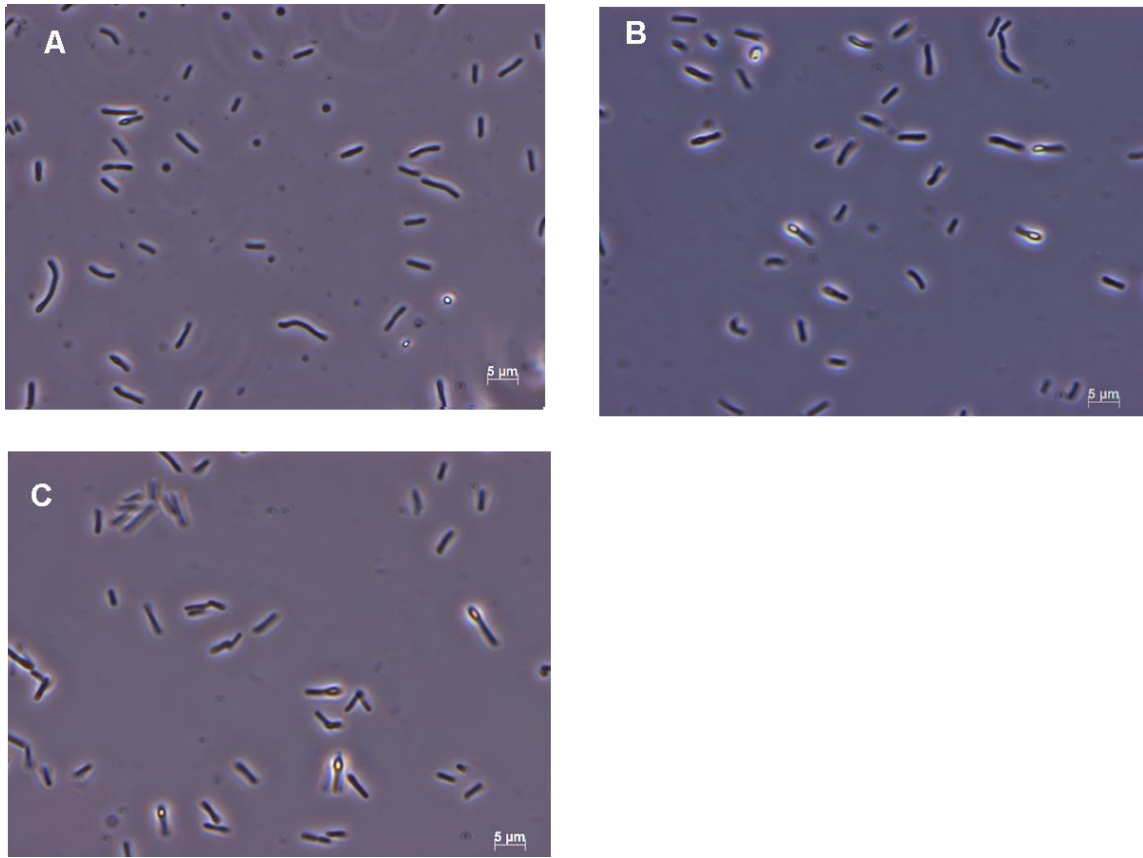

**Figure S3. Phase-contrast micrographs of thermophilic sporeformers.** Planktonic cells and spores of the 3 thermophilic spore forming isolates. **A)** *Anoxybacillus flavithermus* TNO-09.006; **B)** *Geobacillus stearothermophilus* TNO-09.008; **C)** *Geobacillus thermoglucosidans* TNO-09.020.

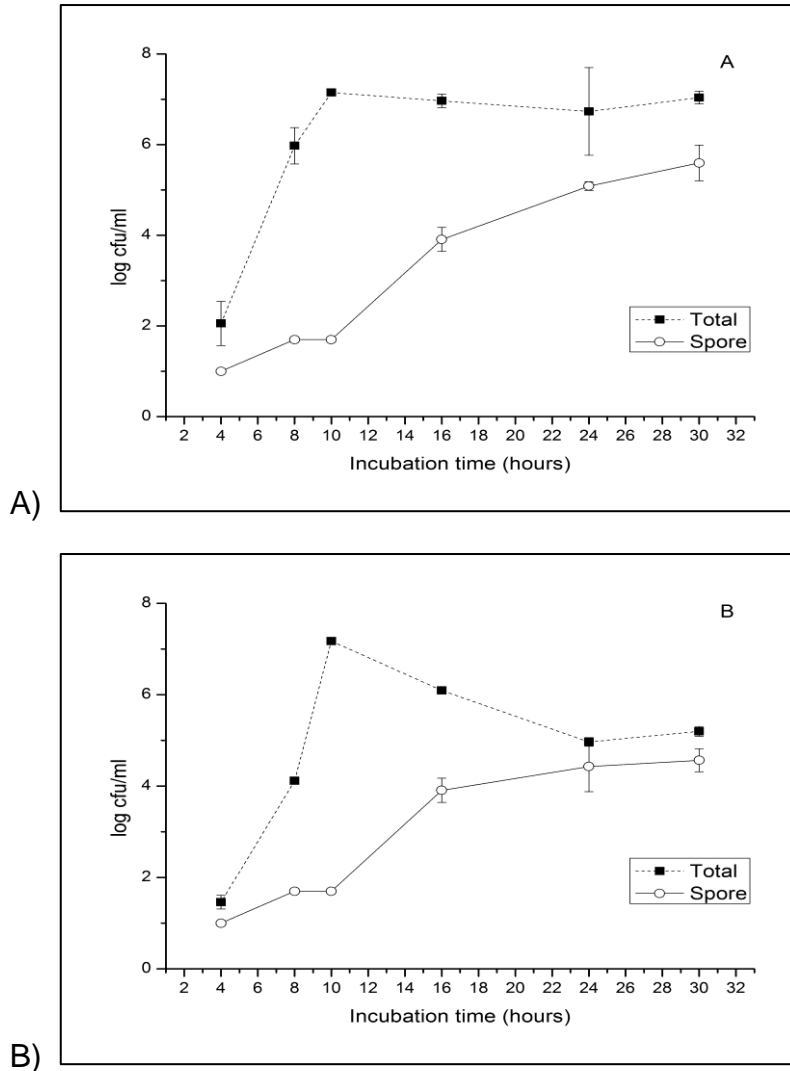

**Figure S4. Colony forming units of *Geobacillus thermoglucosidans* TNO-09.020 in the standing steel biofilm system.**

Graphical representation of bacterial counts development (CFU/ml) in the static standing steel biofilm system with 1% Tryptone at 60 °C. The 2 panels represent **(A)** the planktonic cells from the medium and **(B)** biofilm cells from the steel coupon. The total CFUs were determined, vegetative cells and spores (■), and for the same samples treated for 30 min at 100 °C, allowing spore counts (○). Means and standard deviations from 3 replicate static culture systems are shown.

| Sample description | Id  | Temperature in factory | Concentration or volume | Log(CFU/ml) |             |             |
|--------------------|-----|------------------------|-------------------------|-------------|-------------|-------------|
|                    |     |                        |                         | Total 30 °C | Total 55 °C | Spore 55 °C |
| M1 (Standard milk) | M1  | 4 °C                   | undiluted               | 7.0         | 3.0         | 2.0         |
| M2 (Standard milk) | M2  | 4 °C                   | undiluted               | 4.5         | 3.3         | 1.1         |
| Pipeline 1         | i01 | 75 °C                  | 0.07 g/ml               | 8.7         | 5.0         | 4.0         |
| Pipeline 2         | i02 | 75 °C                  | 1.5 ml                  | 8.7         | 4.0         | 4.0         |
| Pipeline 3         | i03 | 75 °C                  | 0.33 g/ml               | 6.0         | 5.0         | 4.0         |
| Pipeline 4         | i05 | 75 °C                  | 1.5 ml                  | 2.0         | 4.0         | 3.0         |
| Evaporator 1       | i06 | 65 °C                  | 1.0 g/ml                | 8.0         | 4.0         | 2.0         |
| Evaporator 2       | i07 | 65 °C                  | 1.0 g/ml                | 6.1         | 3.4         | 3.0         |
| Pasteur            | i08 | 68 °C                  | 0.90 g/ml               | 6.0         | 3.0         | 3.0         |
| Tank               | i09 | 45 °C                  | 1.0 g/ml                | 8.0         | 4.0         | 3.0         |
| Tankfilter         | i10 | 37 - 45 °C             | 1.0 g/ml                | 7.0         | 3.0         | 2.0         |
| Drying tower       | i11 | 60 °C                  | 0.15 g/ml               | 7.0         | 3.0         | 2.0         |
| Dairy concentrates | i14 | 20 - 60 °C             | 0.10 g/ml               | 2.1         | 2.2         | <1.8        |
| Dairy concentrates | i15 | 20 - 60 °C             | 0.10 g/ml               | <2.1        | 1.8         | 1.8         |

**Table S1. Colony forming units of dairy factory samples used in this study.**

| Medium             | Temperature | Fraction | Log(cfu) / Fraction |
|--------------------|-------------|----------|---------------------|
| M2 (standard milk) | 55°C        | medium   | 5.7                 |
|                    |             | steel    | 5.4                 |
|                    |             | well     | 5.5                 |
|                    | 65°C        | medium   | 3.3                 |
|                    |             | steel    | 1.6                 |
|                    |             | well     | 2.1                 |
| M3 (Standard milk) | 55°C        | medium   | 5.4                 |
|                    |             | steel    | 5.5                 |
|                    |             | well     | 5.6                 |
|                    | 65°C        | medium   | 6.3                 |
|                    |             | steel    | 4.8                 |
|                    |             | well     | 5.8                 |
| Evaporator (i7)    | 55°C        | medium   | 7.0                 |
|                    |             | steel    | 5.5                 |
|                    |             | well     | 5.4                 |
|                    | 65°C        | medium   | 5.7                 |
|                    |             | steel    | 4.2                 |
|                    |             | well     | 4.7                 |

**Table S2. Colony forming units of enrichments at 55°C and 65°C.**

Standard milk (M1 and M2) or sterile milk inoculated with industrial fouling from a whey evaporator (i07) was cultured O/N at 55 or 65°C in plastic culture wells containing standing steel coupons (static biofilm model). The table shows the CFUs in the different fractions in the biofilm system: fraction in the medium (2 ml), on the stainless steel surface, and attached on the plastic well.
